# Supplementary material
Source: PubMed Central journal article supplement (PMC4789929)
Supplement: DS_10.1177_1941738115618638.pdf [file DS_10.1177_1941738115618638.pdf]

**Table 1.** Database Analysis

| Patient | Site/Sex | Age (yrs.) | Time Onset (day) | Signs/ Causes          | Micro-organism        | Type of Surgery | Reoperation                       | Complications                        | Lachman (+, -)/ KT difference, mm |
|---------|----------|------------|------------------|------------------------|-----------------------|-----------------|-----------------------------------|--------------------------------------|-----------------------------------|
| 1       | L/F      | 28         | 5                | Bursitis tibia site    | NA                    | STG/DB          | Debridement, tibial screw removal | None                                 | - / 0                             |
| 2       | R/M      | 30         | 22               | Tibial wound infection | NA                    | PT              | Fastlok removal, debridement      | ROM reduction (3°-115°)              | + / 2                             |
| 3       | L/M      | 24         | 7                | Tibial wound infection | NA                    | ST/SB           | Lavage debridement                | None                                 | - / 1                             |
| 4       | L/M      | 34         | 20               | Fever, knee swelling   | <i>S. epidermidis</i> | STG/DB          | Lavage debridement                | ROM reduction (0°-120°)              | - / 1                             |
| 5       | L/M      | 25         | 6                | Tibial wound infection | <i>S. aureus</i>      | STG/DB          | Wound debridement                 | None                                 | - / 0                             |
| 6       | R/M      | 36         | 4                | Tibial wound infection | NA                    | ST/SB           | Fastlok removal                   | Instability, ROM reduction (2°-120°) | + / 3                             |
| 7       | R/M      | 39         | 5                | Tibial wound infection | NA                    | ST/SB           | Lavage debridement                | None                                 | + / 2                             |

DB, double bundle; F, female; KT difference, mean KT-1000 Arthrometer difference; L, left knee; M, male; PT, patellar tendon; R, right knee; ROM, range of motion; SB, single bundle; ST, semitendinosus; STG semitendinosus and gracilis; NA, not applicable.

**Table 2.** Characteristics, Data, Incidence, and Graft-Specific Incidence

| Study | Authors                              | Year | Level of Evidence | Period (yrs.) | ACLR, n | Infection n (%) | Mean Age (yrs.) <sup>a</sup> | M/F, % <sup>a</sup> | Allograft/Hamstring/BPTB % | H/B  |
|-------|--------------------------------------|------|-------------------|---------------|---------|-----------------|------------------------------|---------------------|----------------------------|------|
| 1     | Abdel-Aziz et al <sup>1</sup>        | 2014 | 2                 | NA            | 2560    | 24 (0.94)       | NA                           | NA                  | NA                         | NA   |
| 2     | Torres-Claramunt et al <sup>24</sup> | 2013 | 4                 | 4             | 810     | 15 (1.8)        | 33.5                         | 76/24               | 0/80/20                    | NA   |
| 3     | Maletis et al <sup>14</sup>          | 2013 | 2                 | 5             | 10,626  | 51(0.48)        | 29.5                         | 64/36               | 41/31/28                   | 8.2  |
| 4     | Sonnery-Cottet et al <sup>23</sup>   | 2011 | 3                 | 5             | 1957    | 12 (0.61)       | 24                           | 100/0               | 0/34/58                    | NA   |
| 5     | Monaco et al <sup>16</sup>           | 2010 | 3                 | 9             | 1232    | 12 (0.97)       | NA                           | NA                  | NA                         | NA   |
| 6     | Barker et al <sup>3</sup>            | 2010 | 3                 | 5             | 3126    | 18 (0.58)       | 34.1                         | 78/22               | 0.44/1.44/0.49*            | 3.34 |
| 7     | Wang et al <sup>27</sup>             | 2009 | 4                 | 11            | 4068    | 21 (0.52)       | 28.6                         | 86/14               | 1.11/0.57/0*               | 2.5  |
| 8     | Katz et al <sup>12</sup>             | 2008 | 3                 | 5             | 801     | 6 (0.75)        | 29                           | NA                  | 1.2/0.6/0*                 | NA   |
| 9     | Schulz et al <sup>22</sup>           | 2007 | 4                 | 10            | 1872    | 24 (0.78)       | 32.5                         | 79/21               | 0/29/50                    | NA   |
| 10    | Van Tongel et al <sup>25</sup>       | 2007 | 4                 | 9             | 1736    | 15 (0.51)       | 31                           | 93/7                | 0/100/0                    | NA   |
| 11    | Binnnet amd Başasrir <sup>4</sup>    | 2007 | 3                 | 8             | 1231    | 6 (0.48)        | 24.5                         | 100/0               | NA/0.64/0.29 <sup>b</sup>  | NA   |
| 12    | Judd et al <sup>11</sup>             | 2006 | 4                 | 8             | 1615    | 11 (2.6)        | 28                           | 72/28               | 0/100/0                    | NA   |
| 13    | Fong and Tan <sup>6</sup>            | 2004 | 4                 | 3             | 472     | 7 (1.0)         | 23                           | 100/0               | 0/100/0                    | NA   |
| 14    | Burks et al <sup>5</sup>             | 2003 | 4                 | 11            | 1918    | 8 (0.42)        | 27                           | 75/25               | 0/88/12                    | NA   |
| 15    | Schollin-Borg et al <sup>21</sup>    | 2003 | 3                 | 3             | 575     | 10 (1.7)        | 28.3                         | 80/20               | 0/40/60                    | NA   |
| 16    | Indelli et al <sup>10</sup>          | 2002 | 4                 | 6             | 3500    | 6 (0.14)        | 32.5                         | 83/17               | NA                         | NA   |

BPTB, bone–patellar tendon–bone graft; H/B, Ratio of infection in Hamstrings and BPTB grafts; NA, not available; n, number.

<sup>a</sup> Among patients with post-ACLR infection.

<sup>b</sup> No allografts used.

\* Incidence of Infection in Allograft/Hamstring/BPTB grafts.

1 **Table 3. Risk Factors and Pathogenesis**

| Study                                   | Risk factors                                                                                                         | Pathogenesis                                                                                                                                                       | Causes                                                                                                                                                                                                                |
|-----------------------------------------|----------------------------------------------------------------------------------------------------------------------|--------------------------------------------------------------------------------------------------------------------------------------------------------------------|-----------------------------------------------------------------------------------------------------------------------------------------------------------------------------------------------------------------------|
| <b>Azar and Arthur<sup>2</sup></b>      | -                                                                                                                    | -                                                                                                                                                                  | Environmental contamination of surgical equipment or hospital stuff is responsible for epidemic                                                                                                                       |
| <b>Barker et al<sup>3</sup></b>         | Hamstring graft                                                                                                      | -                                                                                                                                                                  | Multifilament suture used to prepare hamstring graft; graft harvest site and tunnel site coincides when hamstring tendon is used                                                                                      |
| <b>Binnet et al<sup>4</sup></b>         | Short hamstring tendon with more suture material; postoperative effusion                                             | Grafts act as foreign body<br>Hematoma at tibial tunnel end in subacute and late cases                                                                             | Meniscal repairs/arrows or sutures in graft act as foreign material<br>Adjacent tunnel osteomyelitis in persistent cases<br>Persistent communication between skin and joint by sutures                                |
| <b>Burks et al<sup>5</sup></b>          | Previous knee surgery(arthroscopy or open) in 53%-75% patients                                                       | Post-infectious synovitis and inflammatory mediators causes chondrolysis                                                                                           |                                                                                                                                                                                                                       |
| <b>Fong and Tan<sup>6</sup></b>         | Previous knee surgery(arthroscopy or open) in 53%-75% patients<br>Concomitant surgery in 43%-50% patients            | Hematoma at tibial tunnel end in subacute and late cases                                                                                                           | Meniscal repairs/arrows or sutures in graft act as foreign material                                                                                                                                                   |
| <b>Indelli et al<sup>10</sup></b>       | No risk with concomitant surgery                                                                                     | Grafts act as foreign body                                                                                                                                         |                                                                                                                                                                                                                       |
| <b>Judd et al<sup>11</sup></b>          | Previous knee surgery(arthroscopy or open) in 53%-75% patients<br>Different implants increases risk by 3.2-4.5 times | Grafts act as foreign body<br>Hematoma at tibial tunnel end in subacute and late cases<br>Post-infectious synovitis and inflammatory mediators causes chondrolysis | If normal skin flora cultured, then inoculation must have occurred at the time of surgery or shortly thereafter through femoral or tibial site<br>Meniscal repairs/arrows or sutures in graft act as foreign material |
| <b>Maletis et al<sup>14</sup></b>       | Hamstring graft<br>High BMI                                                                                          |                                                                                                                                                                    | Multifilament suture used to prepare hamstring graft; graft harvest site and tunnel site coincides when hamstring tendon is used                                                                                      |
| <b>Mouzopoulos et al<sup>17</sup></b>   | Subcutaneous fixation material (position of the metallic post/washer/braided suture construct)                       |                                                                                                                                                                    |                                                                                                                                                                                                                       |
| <b>Parada et al<sup>19</sup></b>        | Previous knee surgery(arthroscopy or open) in 53%-75% patients                                                       |                                                                                                                                                                    |                                                                                                                                                                                                                       |
| <b>Plante et al<sup>20</sup></b>        | Hamstring graft                                                                                                      |                                                                                                                                                                    | Multifilament suture used to prepare hamstring graft; graft harvest site and tunnel site coincides when hamstring tendon is used                                                                                      |
| <b>Schollin-Borg et al<sup>21</sup></b> | Concomitant surgery in 43%-50% patients<br>Arthroscopy combined with the use of                                      | Hematoma at tibial tunnel end in subacute and late cases                                                                                                           | Meniscal repairs/arrows or sutures in graft act as foreign material<br>Metal part and the rubber membranes on the suture clamps cannot be                                                                             |

|                                                     |                                             |                                                                                                                                           |
|-----------------------------------------------------|---------------------------------------------|-------------------------------------------------------------------------------------------------------------------------------------------|
|                                                     | intraoperative,<br>intra-articular steroids | sterilized satisfactorily despite<br>sterilization performed in certified<br>autoclaves                                                   |
| <b>Torres-<br/>Claramunt et<br/>al<sup>24</sup></b> | Hamstring graft                             | Multifilament suture used to prepare<br>hamstring graft; graft harvest site and<br>tunnel site coincides when hamstring<br>tendon is used |
| <b>Van Tongel et<br/>al<sup>25</sup></b>            | No risk with<br>concomitant surgery         | -                                                                                                                                         |

2 BMI, body mass index.

3

4

5 **Table 4.** Clinical Presentation and Laboratory Values

| <b>Study</b>                                        | <b>Clinical<br/>Presentation</b>                                                                                                                 | <b>MTO<br/>(range<br/>in days)</b> | <b>Mean<br/>Investigation<br/>Values at Time of<br/>Diagnosis (range)<sup>a</sup></b> | <b>Micro-organism Cultured,<br/>n (%)</b>                                                                                                        |
|-----------------------------------------------------|--------------------------------------------------------------------------------------------------------------------------------------------------|------------------------------------|---------------------------------------------------------------------------------------|--------------------------------------------------------------------------------------------------------------------------------------------------|
| <b>1 (Abdel-Aziz et al<sup>1</sup>)</b>             | Classic<br>Features <sup>5,6,10,27</sup><br>-Acutely swollen<br>painful joint                                                                    | 12 (5-45)                          | NA                                                                                    | CNS: 7 (29)<br>MSSA: 7 (29)<br>OS: 7 (30)<br>NG: 3 (12)                                                                                          |
| <b>2 (Torres-<br/>Claramunt et al<sup>24</sup>)</b> | -Limited range of<br>motion<br>-Sudden increase of<br>pulsatile knee pain                                                                        | 24 (7-35)                          | NA                                                                                    | CNS: 10 (66)<br>MSSA: 2 (19)<br>MRSA: 1 (7)<br>P: 1 (7)                                                                                          |
| <b>3 (Maletis et al<sup>14</sup>)</b>               | -Rapidly increased<br>and persistent<br>effusion<br>-Incision drainage<br>-Local erythema<br>-Warmth<br>-Intermittent fever<br>usually over 38°C | 20 (12-30)                         | NA                                                                                    | <b>Deep-</b> CNS: 11 (32)<br>SA: 8 (24)<br>NG: 9 (26)<br>OS: 6 (18)<br><b>Superficial-</b> SA: 10 (59)<br>CNS: 1 (6)<br>OS: 5 (30)<br>NG: 2 (12) |
| <b>4 (Sonnerly-Cottet<br/>et al<sup>23</sup>)</b>   | -Hyperemic with<br>serous or purulent<br>discharge <sup>4</sup>                                                                                  | 15 (2-37)                          | NA                                                                                    | CNS: 11 (92)<br>P: 1 (8)                                                                                                                         |
| <b>5 (Monaco et al<sup>16</sup>)</b>                |                                                                                                                                                  | NA                                 | ESR: 76                                                                               | CNS: 11 (92)                                                                                                                                     |

|                                           |                                                                  |                   |                                                                                  |                                                         |
|-------------------------------------------|------------------------------------------------------------------|-------------------|----------------------------------------------------------------------------------|---------------------------------------------------------|
|                                           | -Indolent presentation (60%                                      |                   | CRP: 7.4<br>TLC: 8.6                                                             | OS: 1 (8)                                               |
| <b>6 (Barker et al<sup>3</sup>)</b>       | missed on first visit) <sup>21</sup><br>-Exclude large hematomas | 32 (5-205)        | ESR: 79.8(15–118)<br>CRP:17.5(4.5–38.1)<br>TLC: 9.5(6.0 13.8)<br>TLC(joint):11.5 | MSSA: 6 (33)<br>MRSA: 4 (22)<br>P: 2 (11)<br>NG: 6 (33) |
| <b>7 (Wang et al<sup>27</sup>)</b>        | simulating acute symptoms;<br>laboratory investigations needed   | 16 (5-32)         | ESR: 59.7 (9-108)<br>CRP: 8.3 ( 4.1-17.8)<br>TLC: 9.1 ( 4.2-15.2)                | CNS: 11 (52)<br>SA: 2 (9)<br>OS: 3 (14)<br>NG: 5 (25)   |
| <b>8 (Katz et al<sup>12</sup>)</b>        | for confirmation <sup>11</sup>                                   | 16 (6-33)         | ESR: 65.7(30-124)<br>CRP: 27.7(11.2-70.1)<br>TLC: 9.6(7.3-13-7)                  | CNS: 6 (75)<br>NG: 2 (25)                               |
| <b>9 (Schulz et al<sup>22</sup>)</b>      |                                                                  | 61.7 (5–196)      | CRP: 4.8(0.5-17.4)<br>TLC: 9.5 (3.3–17)                                          | CNS: 5 (21)<br>SA: 12 (50)<br>OS: 3 (16)<br>NG: 4 (17)  |
| <b>10 (Van Tongel et al<sup>25</sup>)</b> |                                                                  | 10.9 (3-1y, 3 mo) | ESR: 70.6(40–110)<br>CRP: 146.6(12.9–316.3)<br>TLC: 8.1(6.0–12.8)                | CNS: 8 (53)<br>MSSA: 1 (7)<br>OS: 6 (40)<br>NG: 0 (0)   |
| <b>11 (Binnet et al<sup>4</sup>)</b>      |                                                                  | 22 (14-35)        | ESR: 51(17 to 80)<br>CRP: 29.7(17-42)<br>TLC: >10.                               | SA: 3 (50)<br>OS: 1 (17)<br>NG: 2 (33)                  |
| <b>12 (Judd et al<sup>11</sup>)</b>       |                                                                  | 22.9(6-45)        | ESR: 67<br>CRP: 14<br>TLC: 9.8(4.9-17.7)<br>TLC (joint): 5.2                     | CNS: 8 (72)<br>SA: 1 (9)<br>P: 1 (8)<br>OS: 1 (8)       |
| <b>13 (Fong and Tan<sup>6</sup>)</b>      |                                                                  | 25(7-35)          | ESR:72 (10-95)<br>CRP: 123 (25-215)<br>TLC: 11.7 (10-16)                         | SA: 4 (57)<br>P: 3 (43)                                 |
| <b>14 (Burks et al<sup>5</sup>)</b>       |                                                                  | 19                | NA                                                                               | NA                                                      |

|                                              |  |           |                                                               |                                         |
|----------------------------------------------|--|-----------|---------------------------------------------------------------|-----------------------------------------|
| <b>15 (Schollin-Borg et al<sup>21</sup>)</b> |  | 9.5(4-20) | ESR: 62.3 (22-102)<br>CRP: 84 (10-199)<br>TLC: 8.4 (7.4-10.6) | CNS: 6 (60)<br>SA: 1 (10)<br>P: 1 (10)  |
| <b>16 (Indelli et al<sup>10</sup>)</b>       |  | 7.5(2-20) | NA                                                            | CNS: 2 (33)<br>SA: 3 (50)<br>OS: 1 (17) |

- 6 CNS, coagulase-negative *Staphylococcus*; CRP, C-reactive protein; ESR, erythrocyte sedimentation rate; MRSA,  
7 methicillin-resistant *Staphylococcus aureus*; MSSA, methicillin-sensitive *Staphylococcus aureus*; MTO, mean time  
8 of onset; NA, not available; NG, no growth; OS, other species; P, *Propionibacterium*; SA, *Staphylococcus aureus*;  
9 TLC, total leucocyte count; n, number.  
10 <sup>a</sup>ESR, mm/h; CRP, mg/L; TLC,  $\times 10^9/L$ .

11 **Table 5a.** Arthroscopic Lavage and Graft Retention at Final Follow-up

| Study <sup>a</sup>                               | Arthroscopic Lavage<br>(Mean per Person) | Graft Retention/Removal, N (%) |
|--------------------------------------------------|------------------------------------------|--------------------------------|
| <b>1 (Abdel-Aziz et al<sup>1</sup>)</b>          | 3                                        | 24 (100)/0 (0)                 |
| <b>2 (Torres-Claramunt et al<sup>24</sup>)</b>   | 1.3                                      | 14 (93)/1 (7)                  |
| <b>5 (Monaco et al<sup>16</sup>)</b>             | NR                                       | 14 (100)/0 (0)                 |
| <b>6 (Barker et al<sup>3</sup>)</b>              | 1.5                                      | 13 (72)/5 (28)                 |
| <b>7 (Wang et al<sup>27</sup>)</b>               | 1                                        | 21 (100)/0 (0)                 |
| <b>8 (Katz et al<sup>12</sup>)</b>               | NR                                       | 5 (83)/1 (17)                  |
| <b>9 (Schulz et al<sup>22</sup>)<sup>b</sup></b> | 2.2                                      | 7 (29)/17 (71)                 |
| <b>10 (Van Tongel et al<sup>25</sup>)</b>        | 1.9                                      | 11 (73)/4 (27)                 |
| <b>11 (Binnet et al<sup>4</sup>)</b>             | 2.66                                     | 6 (100)/0 (0)                  |
| <b>12 (Judd et al<sup>11</sup>)</b>              | 2.4                                      | 10 (91)/1 (9)                  |
| <b>13 (Fong and Tan<sup>6</sup>)</b>             | 1.4                                      | 4 (100)/0 (0)                  |
| <b>15 (Schollin-Borg et al<sup>21</sup>)</b>     | 1                                        | 10 (100)/0 (0)                 |
| <b>16 (Indelli et al<sup>10</sup>)</b>           | 1.3                                      | 4 (66)/2 (34)                  |

12 NR, not reported.

13 <sup>a</sup> Studies 3 (Burks et al<sup>5</sup>), 4 (Maletis et al<sup>14</sup>), and 14 (Sonnerly-Cottet et al<sup>23</sup>) were excluded because they followed different protocols

14 <sup>b</sup> Complicated cases.

15

16

17

18

19

20

21

22

23

24 **Table 5b.** Clinical Outcome

| Study <sup>a</sup>                             | Mean Follow-up, mo | Prognosis at Final Follow-up |                   |             |      |                          |            |      |
|------------------------------------------------|--------------------|------------------------------|-------------------|-------------|------|--------------------------|------------|------|
|                                                |                    | Lachman, – (%)               | KT difference, mm | Lysholm     |      | IKDC                     | Tegner     |      |
|                                                |                    |                              |                   | Pre-surgery | FFU  |                          | Pre-injury | FFU  |
| <b>1 (Abdel-Aziz et al<sup>1</sup>)</b>        | 60                 | 91                           | 5 in 2PT          | -           | -    | -                        | 7          | 5.5  |
| <b>2 (Torres-Claramunt et al<sup>24</sup>)</b> | 39.3               | 73.3                         | 1.3               | 90.7        | 77.7 | (86.6/70.4) <sup>b</sup> | -          | -    |
| <b>5 (Monaco et al<sup>16</sup>)</b>           | 38                 | 100                          | 2.5               | -           | 96   | 14 (A/B)                 | -          | -    |
| <b>9 (Schulz et al<sup>22</sup>)</b>           | 66                 | -                            | -                 | -           | 65.6 | 8 (A/B),16 (C/D)         | 6.1        | 3.8  |
| <b>10 (Van Tongel et al<sup>25</sup>)</b>      | 58                 | 54.5                         | 1                 | -           | 83   | 9 (A/B), 2 C             | NR         | 5.6  |
| <b>11 (Binnet et al<sup>4</sup>)</b>           | 102.5              | 33 (66-G1)                   | 2.7               | -           | 81.1 | -                        | NR         | NR   |
| <b>12 (Judd et al<sup>11</sup>)</b>            | 22                 | -                            | -                 | -           | 71.6 | 5 (A/B), 4 (C/D)         | NR         | NR   |
| <b>13 (Fong and Tan<sup>6</sup>)</b>           | 11.7               | 100                          | -                 | -           | -    | 5 A, 2 C                 | 7          | 5.14 |
| <b>15 (Schollin-Borg et al<sup>21</sup>)</b>   | 36                 | 100                          | 1.35(2.95)        | 85.4        | 74.9 | -                        | 8.3        | 5.3  |
| <b>16 (Indelli et al<sup>10</sup>)</b>         | 36                 | -                            | -                 | -           | -    | 3 (A/B),1 C              | NA         | NA   |

25 FFU, final follow up; G, grade of laxity; IKDC, International Knee Documentation Committee objective scale; KT difference, mean difference by KT-1000

26 Arthrometer between infected and control group; NA, not available; NR, not reported; mo, months.

27 IKDC objective: A, normal; B, nearly normal; C, abnormal; D, severely abnormal.

28 <sup>a</sup>Includes studies reporting outcomes with arthroscopic debridement and graft retention as their protocol.

29 <sup>b</sup>IKDC Subjective scale 86.6 (control), 70.4 (infection).

30

31

32

33

34

35



36 **Table 5c.** Mean Duration of Antibiotics, Hospital Stay, and Complications in Included Studies

| Study <sup>a</sup>                             | Mean Duration of Antibiotics | Mean Hospital Stay, d | Complications            |                            |               |                                                                 |                           |               |
|------------------------------------------------|------------------------------|-----------------------|--------------------------|----------------------------|---------------|-----------------------------------------------------------------|---------------------------|---------------|
|                                                |                              |                       | Flexion Deficit, N (deg) | Extension Deficit, N (deg) | Graft Rupture | Osteoarthritis (Joint Space Narrowing or Osteophytes, Crepitus) | Graft Removal (Nonviable) | Osteomyelitis |
| <b>1 (Abdel-Aziz et al<sup>1</sup>)</b>        | NA                           | NA                    | 5                        | 0                          | 3             | 2                                                               | 0                         | 0             |
| <b>2 (Torres-Claramunt et al<sup>24</sup>)</b> | IV: 4 wks<br>O: 2-4 wks      | NR                    | 0                        | 0                          | 0             | 0                                                               | 1                         | 0             |
| <b>7 (Wang et al<sup>27</sup>)</b>             | IV: 19.4 d                   | NR                    | NR                       | NR                         | NR            | NR                                                              | NR                        | NR            |
| <b>9 (Schulz et al<sup>22</sup>)</b>           | NR                           | NR                    | 24 (20)                  | 24 (3)                     | 0             | 1                                                               | 17                        | 0             |
| <b>10 (Van Tongel et al<sup>25</sup>)</b>      | IV: 24.6 d<br>T: 3.2 mo      | 27.2                  | 3 (6-15)                 | 2 (3-5)                    | 2             | 3                                                               | 1                         | 0             |
| <b>11 (Binnet et al<sup>4</sup>)</b>           | IV: 3 wks                    | 19.5                  | 6 (6)                    | 0                          | 0             | 1                                                               | 0                         | 1             |
| <b>12 (Judd et al<sup>11</sup>)</b>            | IV: 4 wks<br>O: 3-4 wks      | NR                    | 2 (20-30)                | 0                          | 0             | 3                                                               | 1                         | 0             |
| <b>13 (Fong and Tan<sup>6</sup>)</b>           | IV: 17.3 d<br>O: 4-6 wks     | 17.3                  | 7 (20)                   | 0                          | 0             | 0                                                               | 0                         | 0             |
| <b>15 (Schollin-Borg et al<sup>21</sup>)</b>   | IV + O:<br>4-12 wks          | NR                    | 0                        | 0                          | 0             | 5                                                               | 0                         | 0             |
| <b>16 (Indelli et al<sup>10</sup>)</b>         | IV: 6 wks                    | NR                    | 0                        | 0                          | 0             | 1                                                               | 1                         | 0             |

37 IV, intravenous; O, oral; T, total; NA, not available; NR, not reported; wks, weeks; d, days; mo, months.

38 <sup>a</sup>Includes studies reporting these parameters with arthroscopic debridement and graft retention as their protocol.

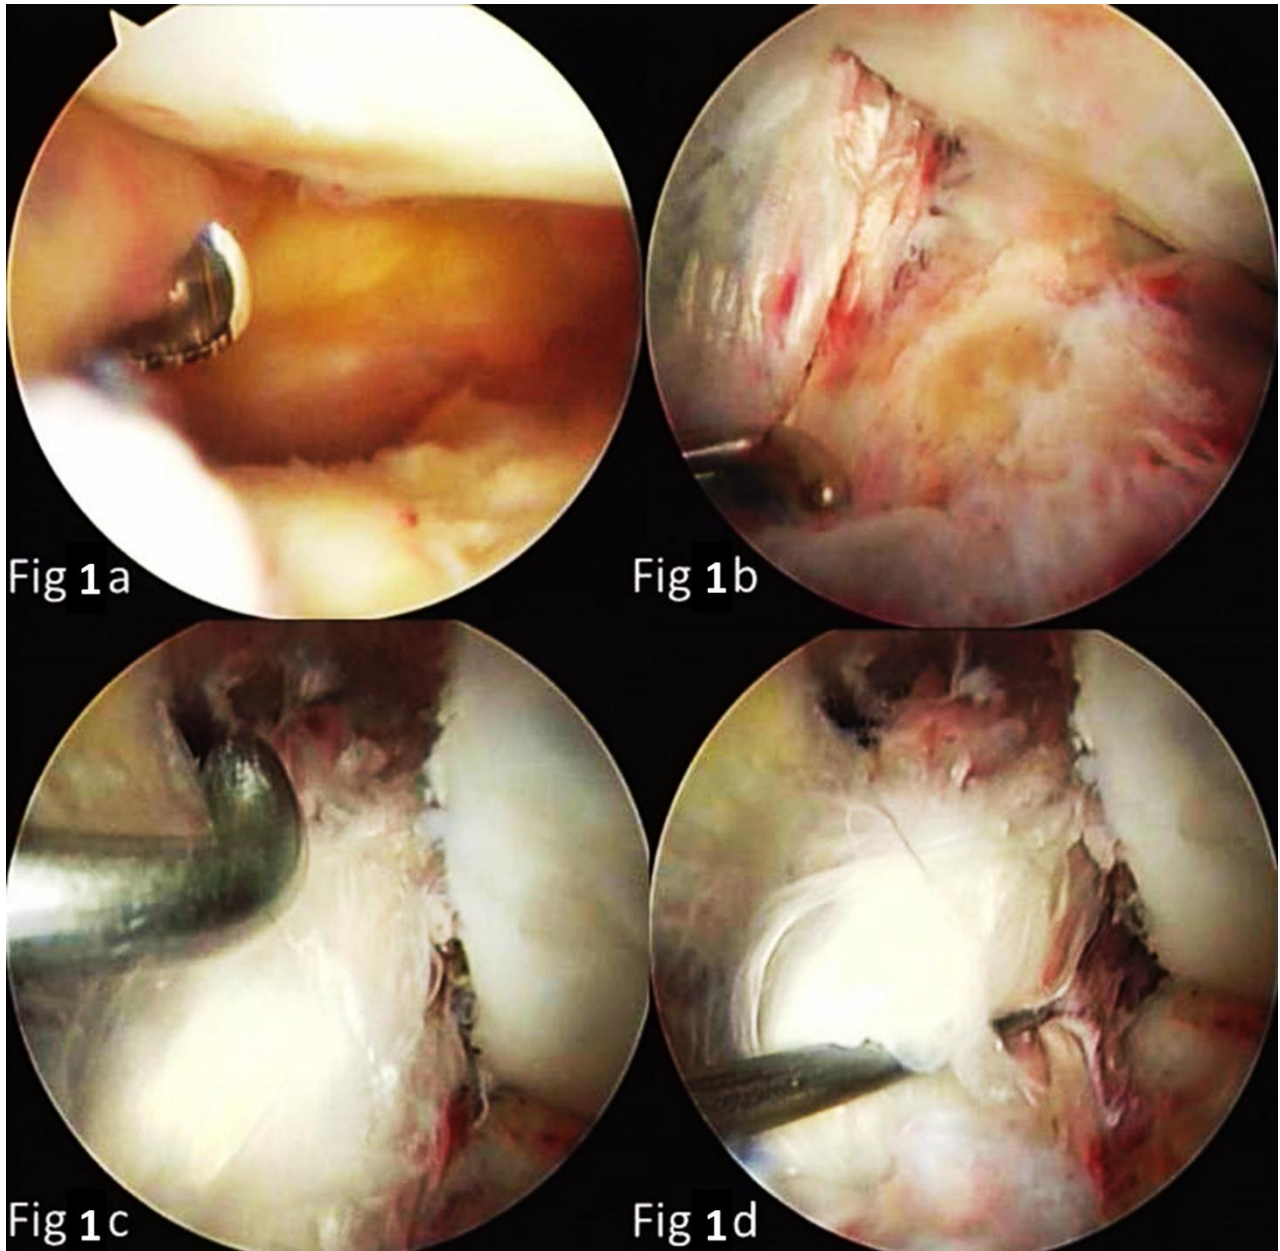

40

41 **Figure 1, a and b.** Subtotal synovectomy for reactive synovitis.

42 **Figure 1c.** Graft condition on first debridement at the end of fifth week post–anterior cruciate ligament  
43 reconstruction.

44 **Figure 1d.** Graft viable and of proper strength on second debridement at the end of seventh week post–  
45 anterior cruciate ligament reconstruction.
